# Supplementary material for: Mapping dynamic QTL for plant height in triticale
Source: PubMed Central journal article supplement (PMC4040121; doi:10.1186/1471-2156-15-59), 2014-05-19
Supplement: 1471-2156-15-59-S1.pdf [file 1471-2156-15-59-S1.pdf]

# Mapping dynamic QTL for plant height in triticale

**Tobias Würschum<sup>1§\*</sup>, Wenxin Liu<sup>2\*</sup>, Lucas Busemeyer<sup>3</sup>, Matthew R. Tucker<sup>4</sup>, Jochen C. Reif<sup>5</sup>, Elmar A. Weissmann<sup>6</sup>, Volker Hahn<sup>1</sup>, Arno Ruckelshausen<sup>3</sup>, Hans Peter Maurer<sup>1</sup>**

<sup>1</sup> State Plant Breeding Institute, University of Hohenheim, 70599 Stuttgart, Germany

<sup>2</sup> Crop Genetics and Breeding Department, China Agricultural University, 100193 Beijing, China

<sup>3</sup> Competence Centre of Applied Agricultural Engineering COALA, University of Applied Sciences Osnabrück, 49076 Osnabrück, Germany

<sup>4</sup> ARC Centre of Excellence for Plant Cell Walls, University of Adelaide, Waite Campus, Urrbrae SA 5064, Australia

<sup>5</sup> Leibniz Institute of Plant Genetics and Crop Plant Research (IPK), 06466 Gatersleben, Germany

<sup>6</sup> Saatzucht Dr. Hege GbR Domäne Hohebuch, 74638 Waldenburg, Germany

§ Corresponding author; \* Joint first authors

## Supplementary Information

This file contains the Supplementary Tables and Figures.

**Table S1 QTL detected for plant height at three developmental stages (PH1-PH3).** Chromosome, position with support interval and proportion of genotypic variance explained by the QTL ( $p_G$  in %).

|            | Chromosome | Position in cM [support interval] | $p_G$ |
|------------|------------|-----------------------------------|-------|
| <i>PH1</i> |            |                                   |       |
|            | 3A         | 57.8 [57.8 - 58.7]                | 1.9   |
|            | 4A         | 21.2 [21.0 - 21.5]                | 4.4   |
|            | 5A         | 3.5 [3.3 - 10.1]                  | 4.2   |
|            | 5A         | 52.5 [51.6 - 52.9]                | 1.4   |
|            | 6A         | 55.5 [55.3 - 56.4]                | 3.5   |
|            | 7A         | 61.5 [61.1 - 61.7]                | 3.1   |
|            | 1B         | 66.7 [66.0 - 67.3]                | 2.8   |
|            | 2B         | 144.5 [142.8 - 147.8]             | 2.0   |
|            | 3B         | 98.1 [97.4 - 98.1]                | 2.1   |
|            | 6B         | 64.7 [64.1 - 65.2]                | 1.8   |
|            | 4R         | 81.7 [77.0 - 81.7]                | 1.9   |
|            | 5R         | 14.4 [13.8 - 15.1]                | 44.0  |
|            | 5R         | 27.5 [26.9 - 27.8]                | 1.4   |
|            | 6R         | 53.5 [53.2 - 53.7]                | 1.8   |
|            | 7R         | 38.1 [37.8 - 38.1]                | 2.4   |
| <i>PH2</i> |            |                                   |       |
|            | 3A         | 57.8 [57.7 - 58.7]                | 2.4   |
|            | 4A         | 20.9 [20.7 - 21.0]                | 3.3   |
|            | 4A         | 98.7 [90.0 - 104.4]               | 1.5   |
|            | 4A         | 106.3 [81.8 - 106.9]              | 0.4   |
|            | 5A         | 18.9 [18.4 - 33.6]                | 1.1   |
|            | 5A         | 31.8 [28.3 - 32.3]                | 2.8   |
|            | 6A         | 58.2 [57.9 - 58.5]                | 10.7  |
|            | 7A         | 61.5 [55.5 - 68.0]                | 1.0   |
|            | 1B         | 70.4 [70.0 - 70.8]                | 1.0   |
|            | 2B         | 144.5 [142.8 - 147.8]             | 1.8   |
|            | 3B         | 24.6 [24.1 - 25.5]                | 1.1   |
|            | 3B         | 53.1 [46.9 - 55.3]                | 0.5   |
|            | 3B         | 100.2 [99.7 - 100.6]              | 1.2   |
|            | 5B         | 21.2 [20.8 - 24.8]                | 2.5   |
|            | 7B         | 78.5 [76.5 - 81.2]                | 1.2   |
|            | 4R         | 48.5 [48.2 - 48.6]                | 3.3   |
|            | 5R         | 17.0 [17.0 - 18.0]                | 41.7  |
|            | 6R         | 72.7 [72.7 - 72.8]                | 1.6   |
| <i>PH3</i> |            |                                   |       |
|            | 3A         | 87.1 [82.2 - 87.2]                | 1.7   |
|            | 4A         | 20.5 [20.4 - 20.7]                | 2.4   |
|            | 5A         | 43.1 [42.3 - 50.1]                | 1.5   |
|            | 6A         | 58.2 [57.9 - 58.5]                | 11.5  |
|            | 5B         | 37.0 [36.5 - 37.5]                | 3.5   |
|            | 1R         | 20.6 [20.5 - 20.6]                | 2.8   |
|            | 5R         | 15.7 [12.7 - 16.3]                | 48.6  |
|            | 6R         | 64.8 [63.9 - 65.0]                | 1.5   |

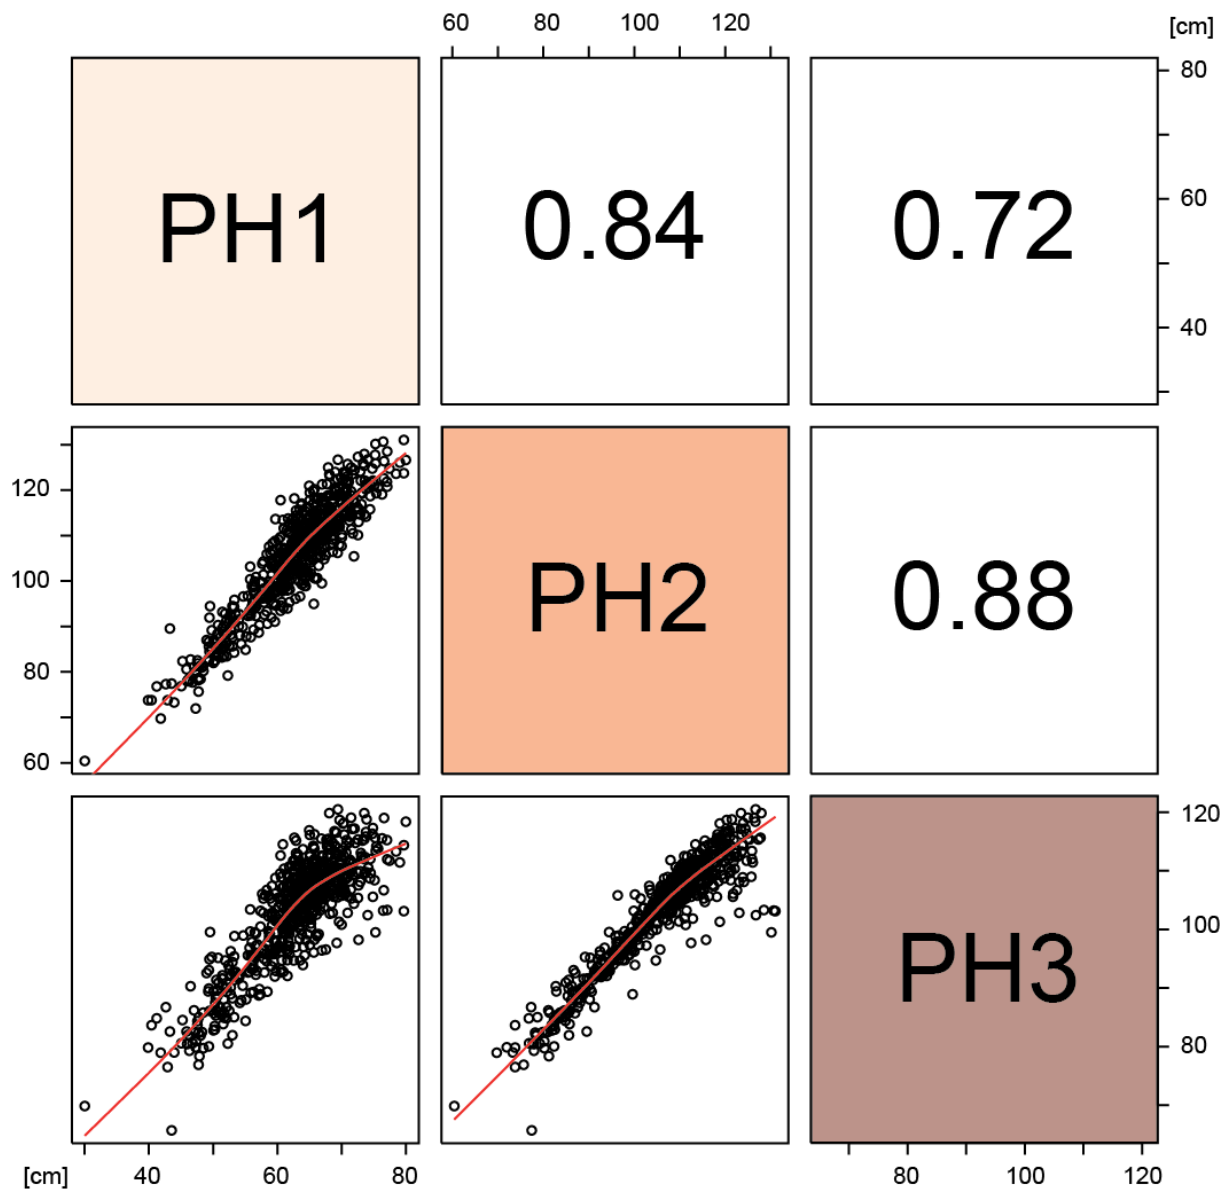

**Figure S1  $R^2$  values between plant height at three developmental stages (PH1-PH3).**

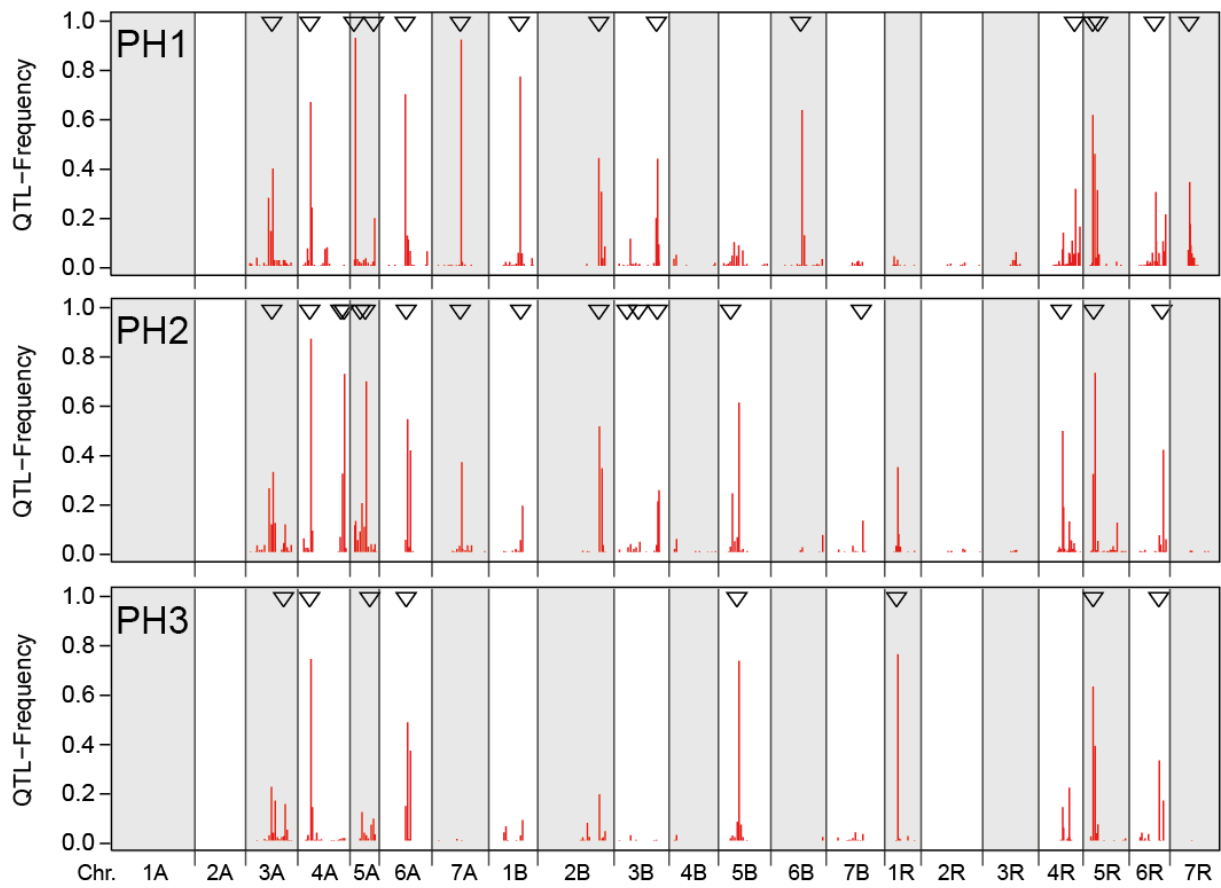

**Figure S2 QTL frequency distributions.** Frequency distributions for the QTL detected at three developmental stages (PH1-PH3) derived from fivefold cross-validation. The arrowheads indicate QTL positions of the full data set.
